# Supplementary material for: Stepwise Development of MAIT Cells in Mouse and Human
Source: PLOS journal article supplement (doi:10.1371/journal.pbio.1000054), 2009-03-06

V $\alpha$ 19-J $\alpha$ 33 Tg C $\alpha$ <sup>-/-</sup>

C57Bl/6

MR1<sup>+/+</sup>

MR1<sup>-/-</sup>

Gated on total thymus

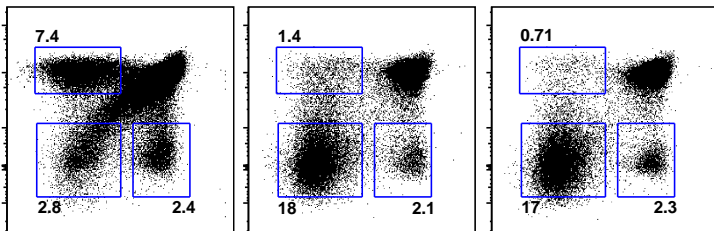

Gated on mature thymocytes (TCR<sup>hi</sup> HSA<sup>lo</sup>)

CD4  
CD8

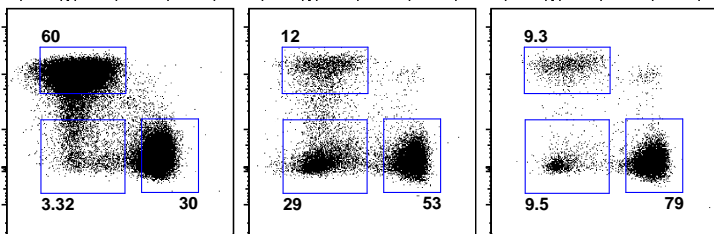

Supplement: S4 (10.1371/journal.pbio.1000054.s004) [file journal.pbio.1000054.s004]
